# Supplementary material for: Electrochemical detection of epinephrine using a biomimic made up of hemin modified molecularly imprinted microspheres
Source: Royal Society of Chemistry journal article supplement (doi:10.1039/c5ra16636e), 2015-01-01
Supplement: c5ra16636e1.pdf [file c5ra16636e1.pdf]

**Electronic Supporting Information (ESI):**

**Electrochemical Detection of Epinephrine Using a Biomimic  
Made Up of Hemin Modified Molecularly Imprinted  
Microspheres**

**Kiran Kumar Tadi,<sup>a</sup> Ramani V. Motghare,<sup>a,\*</sup> V. Ganesh<sup>b,c,\*</sup>**

<sup>a</sup> *Chemistry Department, Visvesvaraya National Institute of Technology, Nagpur – 440010, India. Telephone: +91-712-2801603*

<sup>b</sup> *Electrodics and Electrocatalysis (EEC) Division, CSIR – Central Electrochemical Research Institute (CSIR – CECRI), Karaikudi – 630003, Tamilnadu, India. Telephone: +91-4565-241242. Fax: +91-4565-227779.*

<sup>c</sup> *Academy of Scientific and Innovatibe Research (AcSIR), New Delhi – 110025, India.*

**\* To whom correspondence should be addressed**

**V. Ganesh;** E-mail: [vganesh@cecri.res.in](mailto:vganesh@cecri.res.in) (or) [ganelectro@gmail.com](mailto:ganelectro@gmail.com)

**R. V. Mothgare;** E-mail: [rkkawadkar@chm.vnit.ac.in](mailto:rkkawadkar@chm.vnit.ac.in)

## Figures

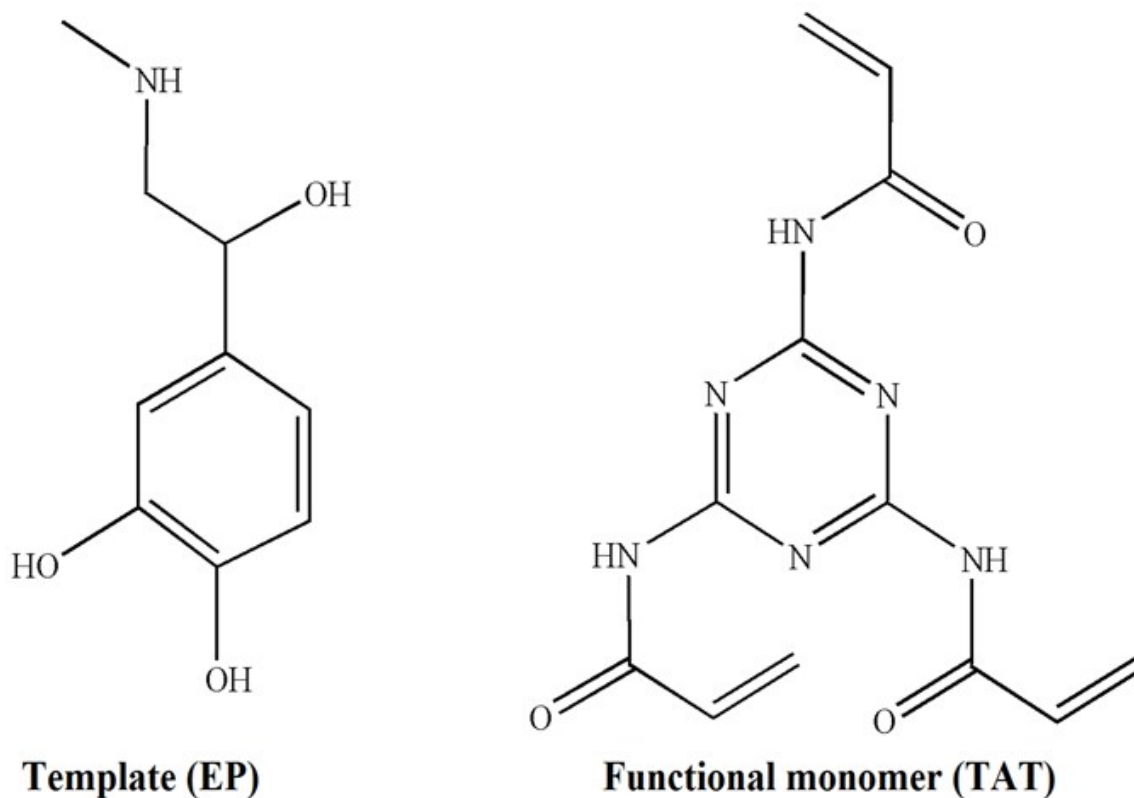

**Figure S1:** Chemical structures of template, epinephrine (EP) and trifunctional monomer, 2,4,6-trisacrylamido-1,3,5-triazine (TAT).

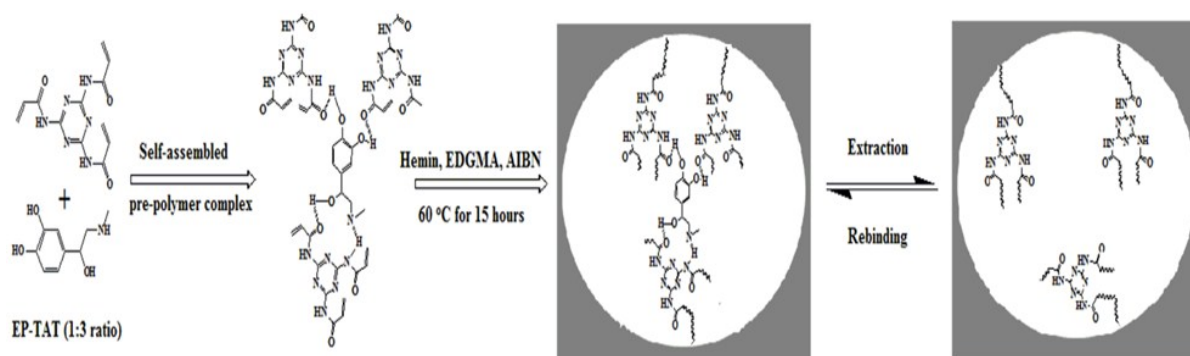

**Figure S2:** Schematic representation of the preparation of hemin modified EP imprinted polymer.

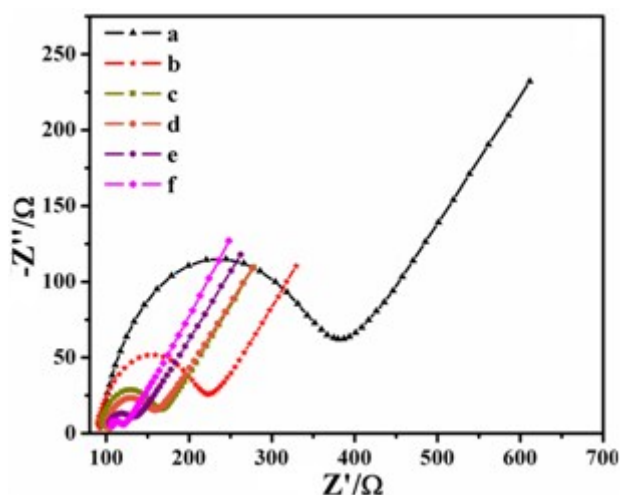

**Figure S3:** EIS of bare Au disc electrode (a), Au/chitosan/nafion/EP–MIP before extraction (b), Au/chitosan/nafion/EP–MIP after extraction of EP (c), Au/chitosan/nafion/EP–MIP/nafion before extraction (d), Au/chitosan/nafion/EP-MIP/nafion after extraction of EP (e), and Au/chitosan/nafion (f) coated electrodes respectively in 5 mmol L<sup>-1</sup> [Fe(CN)<sub>6</sub>]<sup>3-/4-</sup> solution containing 0.1 M KCl as a supporting electrolyte.

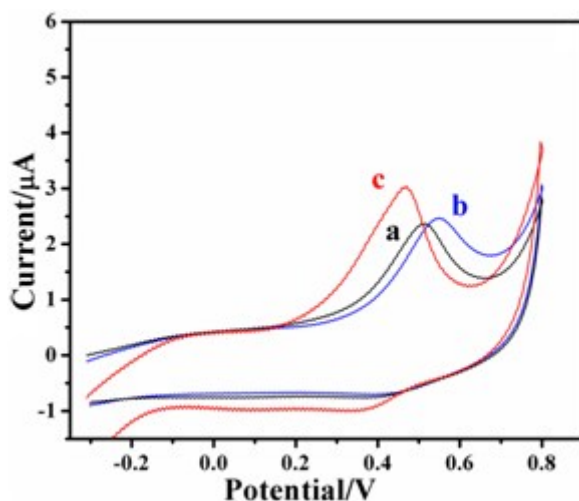

**Figure S4:** CVs recorded at EP–MIP modified Au disc electrode in 0.1 mol L<sup>-1</sup> PBS (pH=7.0) blank solution (a), along with 200  $\mu$ mol L<sup>-1</sup> H<sub>2</sub>O<sub>2</sub> (b), and in presence of 10  $\mu$ mol L<sup>-1</sup> EP (c).

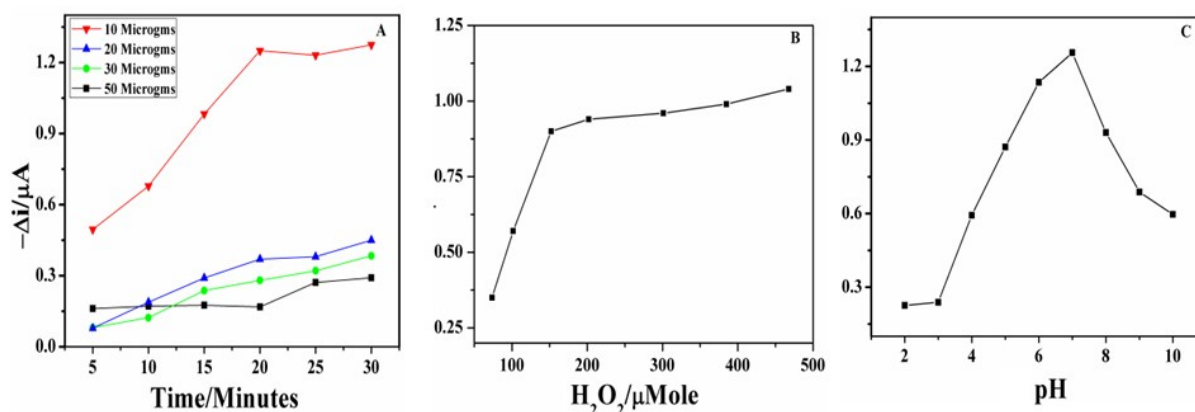

**Figure S5:** Influence of (A) loading 10, 20, 30 and 50  $\mu g$  of MIP microspheres, (B) concentration of  $H_2O_2$  and (C) pH of the medium on the variation of reduction current. Electrolyte: 0.1 mol  $L^{-1}$  PBS (pH=7.0) containing 200  $\mu mol L^{-1}$   $H_2O_2$  at 10  $\mu mol L^{-1}$  EP.

**Table-S1:**

Recovery studies of EP sensing in 25 times diluted human blood serum samples.

| Samples      | Added<br>( $\mu mol L^{-1}$ ) | Found<br>( $\mu mol L^{-1}$ ) | Recovery<br>(%, n=3) |
|--------------|-------------------------------|-------------------------------|----------------------|
|              | --                            | ND                            | --                   |
| Serum Sample | 2.50                          | 2.84                          | 113.6 ( $\pm$ 3.16)  |
|              | 4.97                          | 5.40                          | 108.8 ( $\pm$ 4.35)  |
|              | 9.89                          | 10.36                         | 104.75 ( $\pm$ 3.75) |
